# Supplementary material
Source: publisher figshare collection journal article supplement (https://frontiersin.figshare.com/ndownloader/files/14557031)
Supplement: Supplementary file [file 14557031]

**A.** Please read the text above the pictures and then rate how much you like the objects by circling a number between 1 and 9  
 USE following scale: 1=Do not like at all, 2, 3, 4, 5, 6, 7, 8, 9=like very much. The text describes whether participants are  
 looking TOWARD or AWAY from the objects. There are no correct/incorrect answers.

First please circle your sex **MALE FEMALE** and write your age\_\_ (years)

**SUB NO:**

|                                                                                                                                        |                                                                                                                                            |                                                                                                                                          |                                                                                                                                          |
|----------------------------------------------------------------------------------------------------------------------------------------|--------------------------------------------------------------------------------------------------------------------------------------------|------------------------------------------------------------------------------------------------------------------------------------------|------------------------------------------------------------------------------------------------------------------------------------------|
| Michael looked TOWARD the<br><br>1 2 3 4 5 6 7 8 9    | Judy looked AWAY from the<br><br>1 2 3 4 5 6 7 8 9        | Megan looked AWAY from the<br><br>1 2 3 4 5 6 7 8 9    | Justin looked TOWARD the<br><br>1 2 3 4 5 6 7 8 9     |
| Jennifer looked TOWARD the<br><br>1 2 3 4 5 6 7 8 9   | Simon looked AWAY from the<br><br>1 2 3 4 5 6 7 8 9       | Robert looked AWAY from the<br><br>1 2 3 4 5 6 7 8 9   | Melissa looked TOWARD the<br><br>1 2 3 4 5 6 7 8 9    |
| Matthew looked TOWARD the<br><br>1 2 3 4 5 6 7 8 9    | Sarah looked AWAY from the<br><br>1 2 3 4 5 6 7 8 9       | Lucy looked AWAY from the<br><br>1 2 3 4 5 6 7 8 9     | John looked TOWARD the<br><br>1 2 3 4 5 6 7 8 9       |
| Stephanie looked TOWARD the<br><br>1 2 3 4 5 6 7 8 9  | Joshua looked AWAY from the<br><br>1 2 3 4 5 6 7 8 9     | Joseph looked AWAY from the<br><br>1 2 3 4 5 6 7 8 9  | Lauren looked TOWARD the<br><br>1 2 3 4 5 6 7 8 9    |
| David looked TOWARD the<br><br>1 2 3 4 5 6 7 8 9    | Nicole looked AWAY from the<br><br>1 2 3 4 5 6 7 8 9    | Rachel looked AWAY from the<br><br>1 2 3 4 5 6 7 8 9 | Ryan looked TOWARD the<br><br>1 2 3 4 5 6 7 8 9     |
| Heather looked TOWARD the<br><br>1 2 3 4 5 6 7 8 9  | Andrew looked AWAY from the<br><br>1 2 3 4 5 6 7 8 9    | Brian looked AWAY from the<br><br>1 2 3 4 5 6 7 8 9  | Tiffany looked TOWARD the<br><br>1 2 3 4 5 6 7 8 9  |
| Daniel looked TOWARD the<br><br>1 2 3 4 5 6 7 8 9   | Elizabeth looked AWAY from the<br><br>1 2 3 4 5 6 7 8 9 | Emily looked AWAY from the<br><br>1 2 3 4 5 6 7 8 9  | William looked TOWARD the<br><br>1 2 3 4 5 6 7 8 9  |
| Samantha looked TOWARD the<br><br>1 2 3 4 5 6 7 8 9 | James looked AWAY from the<br><br>1 2 3 4 5 6 7 8 9     | David looked AWAY from the<br><br>1 2 3 4 5 6 7 8 9  | Kimberly looked TOWARD the<br><br>1 2 3 4 5 6 7 8 9 |

**B.** Please read the text above the pictures and then rate how much you like the objects by circling a number between 1 and 9  
USE following scale: 1=Do not like at all, 2, 3, 4, 5, 6, 7, 8, 9=like very much. The text describes whether participants are looking TOWARD or AWAY from the objects. There are no correct/incorrect answers.

First please circle your sex MALE FEMALE and write your age\_\_ (years)

SUB NO:

|                                                                                                                                           |                                                                                                                                         |                                                                                                                                       |                                                                                                                                             |
|-------------------------------------------------------------------------------------------------------------------------------------------|-----------------------------------------------------------------------------------------------------------------------------------------|---------------------------------------------------------------------------------------------------------------------------------------|---------------------------------------------------------------------------------------------------------------------------------------------|
| Michael looked AWAY from the<br><br>1 2 3 4 5 6 7 8 9    | Judy looked TOWARD the<br><br>1 2 3 4 5 6 7 8 9        | Megan looked TOWARD the<br><br>1 2 3 4 5 6 7 8 9    | Justin looked AWAY from the<br><br>1 2 3 4 5 6 7 8 9     |
| Jennifer looked AWAY from the<br><br>1 2 3 4 5 6 7 8 9   | Simon looked TOWARD the<br><br>1 2 3 4 5 6 7 8 9       | Robert looked TOWARD the<br><br>1 2 3 4 5 6 7 8 9   | Melissa looked AWAY from the<br><br>1 2 3 4 5 6 7 8 9    |
| Matthew looked AWAY from the<br><br>1 2 3 4 5 6 7 8 9    | Sarah looked TOWARD the<br><br>1 2 3 4 5 6 7 8 9       | Lucy looked TOWARD the<br><br>1 2 3 4 5 6 7 8 9     | John looked AWAY from the<br><br>1 2 3 4 5 6 7 8 9       |
| Stephanie looked AWAY from the<br><br>1 2 3 4 5 6 7 8 9  | Joshua looked TOWARD the<br><br>1 2 3 4 5 6 7 8 9     | Joseph looked TOWARD the<br><br>1 2 3 4 5 6 7 8 9  | Lauren looked AWAY from the<br><br>1 2 3 4 5 6 7 8 9    |
| David looked AWAY from the<br><br>1 2 3 4 5 6 7 8 9    | Nicole looked TOWARD the<br><br>1 2 3 4 5 6 7 8 9    | Rachel looked TOWARD the<br><br>1 2 3 4 5 6 7 8 9 | Ryan looked AWAY from the<br><br>1 2 3 4 5 6 7 8 9     |
| Heather looked AWAY from the<br><br>1 2 3 4 5 6 7 8 9  | Andrew looked TOWARD the<br><br>1 2 3 4 5 6 7 8 9    | Brian looked TOWARD the<br><br>1 2 3 4 5 6 7 8 9  | Tiffany looked AWAY from the<br><br>1 2 3 4 5 6 7 8 9  |
| Daniel looked AWAY from the<br><br>1 2 3 4 5 6 7 8 9   | Elizabeth looked TOWARD the<br><br>1 2 3 4 5 6 7 8 9 | Emily looked TOWARD the<br><br>1 2 3 4 5 6 7 8 9  | William looked AWAY from the<br><br>1 2 3 4 5 6 7 8 9  |
| Samantha looked AWAY from the<br><br>1 2 3 4 5 6 7 8 9 | James looked TOWARD the<br><br>1 2 3 4 5 6 7 8 9     | David looked TOWARD the<br><br>1 2 3 4 5 6 7 8 9  | Kimberly looked AWAY from the<br><br>1 2 3 4 5 6 7 8 9 |
